# Supplementary material for: Three Decades of Farmed Escapees in the Wild: A Spatio-Temporal Analysis of Atlantic Salmon Population Genetic Structure throughout Norway
Source: PLoS One. 2012 Aug 15;7(8):e43129. doi: 10.1371/journal.pone.0043129 (PMC3419752; doi:10.1371/journal.pone.0043129)
Supplement: Table S1 — Years in which samples were taken for the historical, intermediate, and contemporary data sets. (XLS) [file pone.0043129.s004.xls]

## Sheet: Sheet1
Table S1 - supporting information. Years in which samples were taken for the historic, intermediate, and contemporary data sets.
Three decades of farmed escapees in the wild: a spatio-temporal analysis of Atlantic salmon population genetic structure throughout Norway
Kevin A. Glover1*, María Quintela2, Vidar Wennevik1, François Besnier1, Anne G. E. Sørvik1, Øystein Skaala1
Population	Years sampled
	71	72	73	74	75	76	77	78	79	80	81	82	83	84	85	86	87	88	89	90	91	92	93	94	95	96	97	98	99	00	01	02	03	04	05	06	07	08	09	10
Neiden																			x	x	x	x	x
Vestre Jakobselva																			x	x	x
Alta																		x	x	x
Reisa																x	x	x	x	x	x
Målselva																x	x	x
Roksdalsvassdragget																	x	x	x	x	x	x	x
Namsen
Gaula ST																x			x	x	x	x	x	x
Surna																x	x	x	x
Eira																x	x	x				x		x
Bondalselva																x	x	x
Ørstaelva																x	x	x	x
Gaula SF																	x	x	x	x	x	x	x
Lærdalselva
Vosso																							x	x													*	*
Loneelva																x	x	x	x				x
Opo
Etne
Figgjo																	x		x	x
Numedalslågen																			x	x	x	x	x
Berbyelva																		x	x	x	x	x	x
	Blue samples = Historic data set = the oldest set of samples for each population (see Table 1 in manuscript for N)
	Green = Intermediate data set = neither the oldest nor newest set of samples for each population, used for within-population analyses
	Orange = Contemporary data set = the newest set of samples for each population (see Table 1 in manuscript for N)
	X in box with any colour = Reduced historic data set = the reduced set of 12 populations in the period 1986-1994 to create a historic time-line (CONTINUED ON NEXT LINE)
	(CONTINUED FROM ABOVE LINE) - only used for some specific analyses
	* in box = these two samples separated due to different life-history stages (adults and parr). These are referred to as VossoI2 and VossoC in Fig. 2 in main manuscript.
