# Supplementary material for: Three Decades of Farmed Escapees in the Wild: A Spatio-Temporal Analysis of Atlantic Salmon Population Genetic Structure throughout Norway
Source: PLoS One. 2012 Aug 15;7(8):e43129. doi: 10.1371/journal.pone.0043129 (PMC3419752; doi:10.1371/journal.pone.0043129)
Supplement: Table S2 — Allele frequencies observed in the historical and contemporary data sets for 22 microsatellite markers. (XLS) [file pone.0043129.s005.xls]

## Sheet: Sheet1
Table S2 - supporting information. Allele frequencies observed over 21 Atlantic salmon populations in Norway in historical samples (top) and contemporary samples (bottom).
Three decades of farmed escapees in the wild: a spatio-temporal analysis of Atlantic salmon population genetic structure throughout Norway
Kevin A. Glover1*, María Quintela2, Vidar Wennevik1, François Besnier1, Anne G. E. Sørvik1, Øystein Skaala1
Data is shown for 22 microsatellite markers, with allele calling size in left column, and frequency in the data set in the right hand colum.
Sheet is locked with overvaakning
HISTORIC
	SSsp2201	Frequency	SSsp2210	Frequency	SSspG7	Frequency	Ssa202	Frequency	SsaD144	Frequency	SsaD157	Frequency	Sp1605	Frequency	Sp2216	Frequency	Ssa14	Frequency	Ssa171	Frequency	Ssa289	Frequency	MHC1	Frequency	MHC2	Frequency	SSsp3016	Frequency	SsOsl85	Frequency	Ssa197	Frequency	SsaD486	Frequency	SsaF43	Frequency	CA060208	Frequency	Ssa.19NVH	Frequency	SsaIR002TKU	Frequency	SsaIR010TKU	Frequency
Total	227	0.000506	124	0.145384	115	0.000864	226	0.000481	110	0.003947	275	0.000543	212	0.000486	190	0.000910	136	0.006545	197	0.014535	112	0.005164	118	0.068645	210	0.076632	66	0.004774	179	0.009731	156	0.000441	168	0.000864	103	0.136756	175	0.003506	104	0.089565	219	0.784581	170	0.000433
	231	0.000506	128	0.061691	119	0.001296	230	0.002885	114	0.004386	279	0.002174	216	0.015063	194	0.000455	140	0.633072	201	0.010659	114	0.002151	134	0.107174	230	0.158940	70	0.004774	181	0.227989	164	0.015887	172	0.989196	105	0.000431	183	0.196757	106	0.001304	221	0.026872	172	0.035931
	251	0.006067	132	0.228645	123	0.034140	234	0.004327	118	0.025439	283	0.001087	220	0.001944	198	0.001820	142	0.002182	203	0.005329	116	0.212565	136	0.016829	240	0.049669	82	0.012587	183	0.017146	168	0.125772	176	0.009939	107	0.031061	185	0.410167	108	0.029565	223	0.094273	174	0.860173
	255	0.013650	136	0.037964	127	0.225583	238	0.306250	122	0.035965	287	0.001087	224	0.286200	202	0.019108	144	0.349913	205	0.003876	118	0.469880	138	0.023915	250	0.077578	86	0.044271	185	0.001390	172	0.057811			109	0.010354	187	0.053900	110	0.003478	225	0.094273	176	0.083117
	259	0.010617	140	0.012511	131	0.182800	242	0.100962	126	0.013596	295	0.004348	228	0.008260	206	0.031392	146	0.008290	207	0.001938	120	0.162220	140	0.066873	260	0.343425	90	0.432726	187	0.125579	176	0.076346			113	0.000431	189	0.142419	112	0.001739			178	0.020346
	263	0.035389	144	0.023296	135	0.076059	246	0.155288	130	0.023684	299	0.004891	232	0.145773	210	0.019563			209	0.049419	122	0.134682	142	0.231621	280	0.160833	94	0.122830	189	0.041705	180	0.033098			115	0.569456	191	0.034619	114	0.000435
	267	0.053589	148	0.176877	139	0.032844	250	0.138462	134	0.018860	303	0.005978	233	0.000972	214	0.015469			213	0.188953	124	0.006454	144	0.048273	290	0.085620	98	0.065538	191	0.097312	184	0.081200			117	0.005608	193	0.104294	116	0.000435
	271	0.040445	152	0.190682	143	0.126188	254	0.059135	138	0.027193	307	0.007609	236	0.119534	218	0.024568			217	0.241764	126	0.006885	146	0.173605	300	0.016556	102	0.037760	193	0.062558	188	0.080759			119	0.004745	195	0.034619	118	0.023478
	275	0.073306	156	0.019413	147	0.037165	258	0.083654	142	0.038596	311	0.023913	238	0.021380	222	0.040946			219	0.005814			148	0.062445	310	0.000946	106	0.016493	195	0.162187	192	0.098853			121	0.205781	197	0.003944	120	0.128696
	279	0.068756	160	0.007765	151	0.003025	262	0.058173	146	0.026316	315	0.020109	240	0.046161	226	0.067334			221	0.091570			150	0.007086	360	0.022233	110	0.048177	197	0.180259	196	0.095322			123	0.034081	209	0.015776	122	0.022609
	283	0.071790	164	0.086713	155	0.007779	266	0.047115	150	0.041667	319	0.039130	241	0.000486	230	0.101456			225	0.087209			152	0.000443	370	0.007096	114	0.058160	199	0.022706	200	0.082083			125	0.001294			124	0.230435
	287	0.060667	168	0.007334	159	0.019015	270	0.025481	154	0.067544	323	0.048370	243	0.000486	234	0.157416			229	0.156008			154	0.005314	400	0.000473	118	0.025174	201	0.025023	204	0.033098							126	0.156957
	291	0.057128	172	0.000431	163	0.063526	274	0.005288	158	0.041228	327	0.040217	244	0.229835	238	0.146497			233	0.073159			156	0.000443			122	0.020399	203	0.002317	208	0.042365							128	0.019130
	295	0.070273	176	0.001294	167	0.038894	278	0.003365	162	0.056579	331	0.069565	245	0.016035	242	0.121474			235	0.004360			158	0.050487			126	0.040799	205	0.000463	212	0.026920							130	0.143478
	299	0.059151			171	0.025065	282	0.003846	166	0.100000	335	0.066848	248	0.050534	246	0.090537			237	0.031008			160	0.100089			130	0.044705	211	0.000463	216	0.026920							132	0.012174
	303	0.071790			175	0.015990	286	0.003365	170	0.070175	339	0.072826	249	0.030612	250	0.068699			239	0.002422			162	0.002657			134	0.014323	213	0.004171	220	0.011915							134	0.005217
	307	0.064206			179	0.013829	290	0.001442	174	0.046053	343	0.069565	252	0.022352	254	0.051865			241	0.009690			164	0.034101			138	0.005208	215	0.000463	224	0.022065							136	0.006522
	311	0.053084			183	0.020743	298	0.000481	178	0.050877	347	0.079348	253	0.000972	258	0.033667			243	0.007267							142	0.001302	217	0.017609	228	0.005737							140	0.000870
	315	0.035895			187	0.038462			182	0.066667	351	0.105435	256	0.001458	262	0.005460			245	0.002422									219	0.000927	232	0.003530							142	0.002609
	319	0.028311			191	0.021175			186	0.053070	355	0.077174	260	0.000972	266	0.000455			247	0.004360											236	0.001324							148	0.001304
	323	0.031850			195	0.011236			190	0.041228	359	0.051630	268	0.000486	270	0.000910			249	0.000484											240	0.011033							160	0.004348
	327	0.016178			199	0.004322			194	0.028947	363	0.070109							251	0.006783											244	0.009267							162	0.002174
	331	0.016178							198	0.033772	367	0.032609							253	0.000484											248	0.017652							164	0.005217
	335	0.018706							202	0.021491	371	0.030435							255	0.000484											252	0.011474							168	0.072609
	339	0.023256							206	0.025877	375	0.016848																			256	0.014122							170	0.013478
	343	0.006572							210	0.007018	379	0.011957																			260	0.010591							172	0.016087
	347	0.004044							214	0.009649	383	0.007065																			264	0.001324							174	0.003478
	351	0.001517							218	0.008772	387	0.013043																			268	0.000883							176	0.001739
	355	0.001011							222	0.003509	391	0.009239																			272	0.001324							178	0.000870
	359	0.004044							226	0.004386	395	0.008696																			276	0.000883
	367	0.000506							230	0.002632	399	0.002174
	371	0.000506							234	0.000439	403	0.003804
	383	0.000506							238	0.000439	407	0.000543
											411	0.001630
CONTEMPORARY
	SSsp2201	Frequency	SSsp2210	Frequency	SSspG7	Frequency	Ssa202	Frequency	SsaD144	Frequency	SsaD157	Frequency	Sp1605	Frequency	Sp2216	Frequency	Ssa14	Frequency	Ssa171	Frequency	Ssa289	Frequency	MHC1	Frequency	MHC2	Frequency	SSsp3016	Frequency	SsOsl85	Frequency	Ssa197	Frequency	SsaD486	Frequency	SsaF43	Frequency	CA060208	Frequency	Ssa.19NVH	Frequency	SsaIR002TKU	Frequency	SsaIR010TKU	Frequency
Total	239	0.000707	124	0.145014	119	0.001404	230	0.001417	102	0.000355	279	0.000715	212	0.000362	198	0.001058	136	0.001423	197	0.011686	100	0.000713	118	0.069425	210	0.079466	66	0.009097	179	0.013343	164	0.011189	168	0.002092	103	0.138424	175	0.000736	102	0.000362	217	0.000360	164	0.000361
	243	0.001414	128	0.060042	123	0.043188	234	0.004607	110	0.003546	281	0.000358	216	0.008333	202	0.022214	140	0.624555	201	0.004249	112	0.008553	134	0.094670	230	0.144866	70	0.009097	181	0.198385	168	0.124126	172	0.994073	105	0.002789	183	0.203458	104	0.100868	219	0.800360	170	0.000361
	247	0.001414	132	0.208567	127	0.220506	238	0.317151	114	0.010638	283	0.001431	220	0.002899	206	0.037024	142	0.002491	203	0.006728	114	0.001069	136	0.022440	240	0.052391	78	0.000350	183	0.014747	172	0.059790	176	0.003835	107	0.029637	185	0.401766	108	0.020607	221	0.037770	172	0.034682
	251	0.002475	136	0.043188	131	0.162570	242	0.094614	118	0.031206	287	0.001073	224	0.285507	210	0.017278	144	0.357651	205	0.001062	116	0.215253	138	0.021038	250	0.067862	82	0.021344	185	0.000351	176	0.074825			109	0.013250	187	0.049669	110	0.002169	223	0.085252	174	0.861272
	255	0.013083	140	0.014747	135	0.071629	246	0.146704	122	0.047163	295	0.001431	228	0.007246	214	0.020451	146	0.013879	207	0.001062	118	0.475766	140	0.079243	260	0.379395	86	0.045486	187	0.129916	180	0.031119			113	0.000349	189	0.144224	112	0.001808	225	0.076259	176	0.076590
	259	0.010608	144	0.021770	139	0.040379	250	0.130758	126	0.014184	299	0.002861	232	0.140942	218	0.034908			209	0.058074	120	0.162865	142	0.238780	270	0.000703	90	0.430721	189	0.033006	184	0.067483			115	0.577755	191	0.030537	118	0.023861			178	0.026734
	263	0.027228	148	0.183638	143	0.136938	254	0.055989	130	0.029433	303	0.003934	236	0.131159	222	0.052539			213	0.208215	122	0.121525	144	0.039621	280	0.150492	94	0.124213	191	0.106742	188	0.088112			117	0.007671	193	0.103385	120	0.114967
	267	0.040665	152	0.202949	147	0.048455	258	0.105599	134	0.023404	307	0.016452	238	0.017391	226	0.076869			217	0.229462	124	0.009266	146	0.177770	290	0.064698	98	0.059132	193	0.062500	192	0.095804			119	0.003138	195	0.045622	122	0.022415
	271	0.039250	156	0.013343	151	0.005267	262	0.048547	138	0.031560	311	0.019671	240	0.050000	230	0.087447			219	0.002479	126	0.004633	148	0.066269	300	0.018987	102	0.032540	195	0.155899	196	0.111888			121	0.206416	197	0.002208	124	0.218004
	275	0.073197	160	0.010534	155	0.006320	266	0.047130	142	0.035816	315	0.015021	242	0.000362	234	0.147391			221	0.111898	128	0.000356	150	0.005610	310	0.000352	106	0.024143	197	0.194874	200	0.082867			123	0.019874	209	0.017660	126	0.172813
	279	0.078854	164	0.081461	159	0.019663	270	0.032601	146	0.031206	319	0.041488	243	0.001087	238	0.126587			225	0.076133			154	0.001753	350	0.000352	110	0.035689	199	0.024228	204	0.031469			125	0.000697	215	0.000368	128	0.019884
	283	0.068600	168	0.011587	163	0.074789	274	0.006733	150	0.033333	323	0.037196	244	0.219928	242	0.113188			227	0.000354			156	0.000351	360	0.028481	114	0.046186	201	0.037219	208	0.039860					217	0.000368	130	0.133406
	287	0.058345	172	0.001756	167	0.024228	278	0.003544	154	0.064894	327	0.048641	245	0.021014	246	0.094147			229	0.136331			158	0.055750	370	0.011603	118	0.027642	203	0.004213	212	0.032168							132	0.016269
	291	0.062942	176	0.001404	171	0.023525	282	0.001417	158	0.039362	331	0.065808	248	0.057971	250	0.074753			233	0.070113			160	0.094320	400	0.000352	122	0.018195	205	0.000351	216	0.018182							134	0.005785
	295	0.075672			175	0.012992	286	0.001417	162	0.067021	335	0.073319	249	0.020290	254	0.058886			235	0.005666			162	0.005259			126	0.050385	211	0.001053	220	0.010140							136	0.009400
	299	0.053748			179	0.016152	290	0.001063	166	0.076241	339	0.070458	252	0.032971	258	0.027504			237	0.032932			164	0.027349			130	0.045486	213	0.002458	224	0.017483							140	0.001085
	303	0.077086			183	0.026685	294	0.000354	170	0.065957	343	0.080472	253	0.000362	262	0.007052			239	0.002125			166	0.000351			134	0.016445	215	0.000351	228	0.008042							142	0.002169
	307	0.065064			187	0.032303	298	0.000354	174	0.050355	347	0.074392	256	0.001449	266	0.000353			241	0.016643							136	0.000350	217	0.017556	232	0.002098							146	0.000723
	311	0.055516			191	0.019663			178	0.048936	351	0.096209	268	0.000725	270	0.000353			243	0.007436							138	0.002799	219	0.002107	236	0.004895							148	0.002892
	315	0.048798			195	0.010534			182	0.055674	355	0.074750							245	0.003541							140	0.000350			240	0.005944							152	0.000362
	319	0.026874			199	0.002809			186	0.069858	359	0.058298							247	0.002125							142	0.000350			244	0.004545							158	0.000362
	323	0.034300							190	0.034043	363	0.060801							249	0.002833											248	0.023077							160	0.003977
	327	0.015912							194	0.028369	367	0.033619							251	0.006728											252	0.018531							162	0.001808
	331	0.015205							198	0.033688	371	0.031474							253	0.002125											256	0.015385							164	0.002169
	335	0.014851							202	0.018440	375	0.018956																			260	0.011888							168	0.075560
	339	0.015912							206	0.016667	379	0.017167																			264	0.004196							170	0.018077
	343	0.005658							210	0.007447	383	0.012876																			268	0.000699							172	0.020607
	347	0.004243							214	0.008156	387	0.011087																			272	0.002797							174	0.006869
	351	0.006011							218	0.008511	391	0.009299																			276	0.001399							178	0.000362
	355	0.001061							222	0.005674	395	0.008226																											188	0.000362
	359	0.004243							226	0.001773	399	0.005722
	363	0.000707							230	0.002482	403	0.003934
	383	0.000354							234	0.003191	407	0.001073
									238	0.001418	411	0.001788
